# Supplementary material for: Olive Mill Wastewater as Source of Polyphenols with Nutraceutical Properties
Source: MDPI journal article supplement (doi:10.3390/nu15173746), 2023-08-26
Supplement: s1 [file s1]

## Supplementary Materials

# Olive mill wastewater as source of polyphenols with nutraceutical properties

**Doretta Cuffaro**<sup>1,2#</sup>, **Andrea Bertolini**<sup>3#</sup>, **Simone Bertini**<sup>1</sup>, **Claudio Ricci**<sup>4</sup>, **Maria Grazia Cascone**<sup>4,5</sup>, **Serena Danti**<sup>4</sup>, **Alessandro Saba**<sup>2,3</sup>, **Marco Macchia**<sup>1,2</sup>, **Maria Digiacomo**<sup>1,2\*</sup>

<sup>1</sup> Department of Pharmacy, University of Pisa, via Bonanno 6, 56126, Pisa, Italy.  
doretta.cuffaro@unipi.it (D.C.), simone.bertini@unipi.it (S.B.), marco.macchia@unipi.it (M.M)

<sup>2</sup> Interdepartmental Research Center "Nutraceuticals and Food for Health", University of Pisa, 56100, Pisa, Italy

<sup>3</sup> Department of Surgery, Medical, Molecular and Critical Area Pathology, University of Pisa, 56126, Pisa, Italy a.bertolini2@student.unipi.it (A.B.), alessandro.saba@unipi.it (A.S.)

<sup>4</sup> Dept. of Civil and Industrial Engineering, University of Pisa, Pisa, Italy;  
claudio.ricci@unipi.it (C.R.), maria.grazia.cascone@unipi.it (M.G.C.);  
serena.danti@unipi.it (S.D.)

<sup>5</sup> Dept. of Transl. Res. and New Technologies in Medicine and Surgery, University of Pisa, 56126, Pisa, Italy.

\* Corresponding authors: maria.digiacomo@unipi.it (M.D.);

#The authors contributed equally to this work.

**Table S1.** Calibration curves concentrations for each analyte in ESI-MS analysis.

| Analyte Name                                                                                                                                | Range of concentrations in calibration curve<br>(ng/mL) |
|---------------------------------------------------------------------------------------------------------------------------------------------|---------------------------------------------------------|
| Tyrosol, Verbascoside, Rutin                                                                                                                | 0-3.91-7.81-15.6-31.3-62.5-125-250-500                  |
| Oleocanthal, Oleocanthalic acid, Hydroxytyrosol,<br>Ferulic Acid, Vanillic acid, Pinoresinol/1-<br>acetoxypinoresinol, Apigenin-7-glucoside | 0-1.95-3.91-7.81-15.6-31.3-62.5-125-250                 |
| Caffeic acid, Syringic acid, <i>p</i> -Coumaric acid,<br>Vanillin, Luteolin-7-glucoside, Oleuropein                                         | 0-0.781-1.56-3.13-6.25-12.5-25-50-100                   |
| Oleacein                                                                                                                                    | 0-7.81-15.6-31.3-62.5-125-250-500-1000                  |
